# Supplementary material for: Selective dorsal rhizotomy from indication to rehabilitation: a worldwide survey
Source: Springer Nature journal article supplement (doi:10.1007/s00381-025-06786-5), 2025-03-17
Supplement: MOESM1 [file 381_2025_6786_MOESM1_ESM.pdf]

## **Supplementary Material**

### **Selective dorsal rhizotomy from indication to rehabilitation: A worldwide survey**

Journal: Child's Nervous System

Liza M.M. van Dijk<sup>1,2</sup>, K. Mariam Slot<sup>3,4</sup>, Tom F. Novacheck<sup>5</sup>, SDR working group, Annemieke I. Buizer<sup>1,2,4\*</sup>, Nelleke G. Langerak<sup>6,7\*</sup>

<sup>1</sup> Department of Rehabilitation Medicine, Amsterdam UMC location Vrije Universiteit, Amsterdam, The Netherlands.

<sup>2</sup> Rehabilitation and Development, Amsterdam Movement Sciences, Amsterdam, The Netherlands.

<sup>3</sup> Department of Neurosurgery, Amsterdam UMC Location Universiteit van Amsterdam, Amsterdam, The Netherlands.

<sup>4</sup> Emma Children's Hospital, Amsterdam UMC, Amsterdam, The Netherlands.

<sup>5</sup> Gillette Children's Specialty Healthcare, Saint Paul, MN, USA.

<sup>6</sup> Division of Neurosurgery, Neuroscience Institute, University of Cape Town, Cape Town, South Africa.

<sup>7</sup> Department of Research, Sint Maartenskliniek, Nijmegen, the Netherlands.

Email corresponding author: [nellekelangerak@hotmail.com](mailto:nellekelangerak@hotmail.com)

Supplementary Information 1: Empty tables sent to participating centers

Diagnosis

| Center | Diagnosis    |               |       | GMFCS |    |     |    |   | Age                          |                     |
|--------|--------------|---------------|-------|-------|----|-----|----|---|------------------------------|---------------------|
|        | CP bilateral | CP unilateral | Other | I     | II | III | IV | V | Children (typical age range) | Adolescent or Adult |
|        |              |               |       |       |    |     |    |   |                              |                     |
|        |              |               |       |       |    |     |    |   |                              |                     |
|        |              |               |       |       |    |     |    |   |                              |                     |

*XX = typical / X = will do, but less common / 0 = will not do/essentially never*  
*Abbreviation: GMFCS: CP: Cerebral palsy, Gross Motor Function Classification System*

Selection Process

| Center | Who is involved in selection process? |                    |             |         |       | Method  |             |         |                  |       |
|--------|---------------------------------------|--------------------|-------------|---------|-------|---------|-------------|---------|------------------|-------|
|        | Neuro-surgeon                         | Orthopedic surgeon | Physiatrist | PT / OT | Other | History | Examination | Imaging | 3D Gait analysis | Other |
|        |                                       |                    |             |         |       |         |             |         |                  |       |
|        |                                       |                    |             |         |       |         |             |         |                  |       |
|        |                                       |                    |             |         |       |         |             |         |                  |       |

*XX = typical / X = will do, but less common / 0 = will not do/essentially never*  
*Abbreviations: CP: Cerebral palsy, OT: occupational therapist, PT = physiotherapist*

Selection criteria

| Center | Inclusion Criteria |                |             |          |               |           |             |                      |       |
|--------|--------------------|----------------|-------------|----------|---------------|-----------|-------------|----------------------|-------|
|        | Age (range)        | Etiology of CP | Muscle tone | Strength | Motor control | Cognition | CNS imaging | Access post-op rehab | Other |
|        |                    |                |             |          |               |           |             |                      |       |
|        |                    |                |             |          |               |           |             |                      |       |
|        |                    |                |             |          |               |           |             |                      |       |

*XX = need to be eligible for SDR / X = preferably, not necessary / 0 = not a selection criteria*  
*Abbreviations: CNS: central nervous system, CP: cerebral palsy, post-op rehab: post-operative rehabilitation.*

| Center | Exclusion Criteria |            |              |                            |                                  |
|--------|--------------------|------------|--------------|----------------------------|----------------------------------|
|        | Not CP             | Mixed tone | Contractures | No access to post-op rehab | Other (list, e.g. prior surgery) |
|        |                    |            |              |                            |                                  |
|        |                    |            |              |                            |                                  |
|        |                    |            |              |                            |                                  |

*XX = absolute exclusion criteria for SDR / X = not preferably, but not an absolute exclusion criteria / 0 = not a selection criteria*  
*Abbreviations: CP: cerebral palsy post-op rehab: post-operative rehabilitation.*

Surgical technique

| Center | Technique              | Laminectomies                 |                                    | Use of electro-physiological mapping |                                                       |                               |
|--------|------------------------|-------------------------------|------------------------------------|--------------------------------------|-------------------------------------------------------|-------------------------------|
|        | Multi- or single level | Level of laminotomies (range) | Laminectomy <i>or</i> laminoplasty | Mandatory, mostly or never           | Monitored: Surgeon, other MD, Neurophysiologist or PT | CMAP, MEP's, SSEP's or H-wave |
|        |                        |                               |                                    |                                      |                                                       |                               |
|        |                        |                               |                                    |                                      |                                                       |                               |
|        |                        |                               |                                    |                                      |                                                       |                               |

Abbreviations: CMAP: Compound muscle action potential, MD: medical doctor, MEP's: motor evoked potentials, PT: physiotherapist, SSEP: Somatosensory Evoked Potentials, tEMG: Triggered Electromyography.

| Center | Rootlets                          |                             |                                                     |                                                                                   |                     |
|--------|-----------------------------------|-----------------------------|-----------------------------------------------------|-----------------------------------------------------------------------------------|---------------------|
|        | Decision pre-op or during surgery | Percentage rootlets (range) | Level of cutting rootlets: Conus or at exit foramen | Differentiating motor vs sensory: Anatomical, Electrophysiological or combination | Use of EMG guidance |
|        |                                   |                             |                                                     |                                                                                   |                     |
|        |                                   |                             |                                                     |                                                                                   |                     |
|        |                                   |                             |                                                     |                                                                                   |                     |

Abbreviation: EMG: Electromyography.

Rehabilitation

| Center | Rehabilitation                    |                                    |                                              |                       |                                                 |
|--------|-----------------------------------|------------------------------------|----------------------------------------------|-----------------------|-------------------------------------------------|
|        | Time inpatient program<br>(weeks) | Time outpatient program<br>(weeks) | Frequency of therapy<br>(hospital/community) | Use/Type of orthotics | Modalities used (e.g.<br>lokomat, hydrotherapy) |
|        |                                   |                                    |                                              |                       |                                                 |
|        |                                   |                                    |                                              |                       |                                                 |
|        |                                   |                                    |                                              |                       |                                                 |

Post-operative evaluation

| Center | Follow-up             |                           |                              |
|--------|-----------------------|---------------------------|------------------------------|
|        | Frequency of check-up | Post-operative Assessment | If so, outcome measures used |
|        |                       |                           |                              |
|        |                       |                           |                              |
|        |                       |                           |                              |

## Supplementary Information 2 : Participating centers

### Selective Dorsal Rhizotomy experiences around the world

Register (\$50): <https://icmsaust.eventsair.com/ausacpdmiaacd-2022---childhood-disabilities/registration-form-virtual/Site/Register>

Pre-conference workshop  
1<sup>st</sup> March 2022

**Presenters**

- Cape Town / Stellenbosch, South Africa**  
Assoc Prof Nelleke Langerak, Dr Nico Enslin, Prof Robert Lamberts
- St Paul, United States of America**  
Prof Tom Novacheck, Dr Marcie Ward
- New York, United States of America**  
Prof Rick Abbott
- London, United Kingdom**  
Dr Kristian Aquilina
- Amsterdam, the Netherlands**  
Prof Annemieke Buizer
- Shanghai, China**  
Dr Xiao Bo
- Tokyo, Japan**  
Dr Nobuhito Morota
- Sydney, Australia**  
Dr Simon Paget, Jenny Lewis
- Melbourne, Australia**  
Dr Neil Wimalasundera, Pam Thomason
- Brisbane, Australia**  
Meredith Wynter

### Supplementary Information 3: Filled tables regarding the rehabilitation process

| Center   | Rehabilitation                 |                                                                |                                                                                                          |                                                                                 |                                                          |
|----------|--------------------------------|----------------------------------------------------------------|----------------------------------------------------------------------------------------------------------|---------------------------------------------------------------------------------|----------------------------------------------------------|
|          | Time inpatient program (weeks) | Time outpatient program                                        | Frequency of therapy (hospital/community)                                                                | Use/Type of orthotics                                                           | Modalities used (e.g. lokomat, hydrotherapy)             |
| <b>A</b> | 1                              | Daily for 2 weeks, then 2-3x/week, intense blocks prn          | Hospital 2x/day in week 1; home: daily in week 2-3; then 2-3x/week                                       | Only if needed for function (AFO's)                                             | NDT                                                      |
| <b>B</b> | 6                              | Daily for 3 months, then 2-3x/week                             |                                                                                                          | Stiff PLS AFO                                                                   | Lokomat for GMFCS III/IV, hydrotherapy, treadmill        |
| <b>C</b> | 4-6                            | Daily, then 2-3x/week for 5-6 months                           | Hospital 3 sessions; home daily 45-60 minutes for 5-6 months, 45-60 minutes 2x/week                      | AFO with check strap to allow variable dorsiflexion as tolerated                |                                                          |
| <b>D</b> | 1 (hospital ward)              | 2 weeks (stay in hospital in patient hotel)                    | Twice daily for 3 weeks; then 3x/week after discharge                                                    | AFO                                                                             | Hydrotherapy, treadmill                                  |
| <b>E</b> | 0                              | 5x/week for 3 months, then 2-3x/week up to a year post surgery | Community: physiotherapy 5x/week for 3 months, then 2-3x/week up to a year post surgery                  | Rigid ventral AFOs for the first year, thereafter, depending on gait parameters | Functional gait training and strength training           |
| <b>F</b> | 6                              | None (evaluation 1x/year)                                      | Hospital: 1x/day for 6 weeks; community: 2-4x/month for 12 months; 1-2x/month thereafter; home: 1-3x/day | Whenever needed                                                                 | None                                                     |
| <b>G</b> | 1.5                            | 12 months minimal                                              | 5 days/week, 6 hours/day                                                                                 | Stiff PLS AFO                                                                   | Treadmill                                                |
| <b>H</b> | 4                              | 2-6 weeks daily-, intensive blocks prn                         | Hospital: 2x/day for 6 weeks; community: 2-3x/week for 12 months, 2x/week for 12-24 months               | SAFOs +/- wedge                                                                 | Hydrotherapy, treadmill, Litegait, FES, cycling, lokomat |

Abbreviations: AFO: Ankle-foot orthosis, FES: Functional electrical stimulation, GMFCS: Gross Motor Function Classification System, NDT: Neurodevelopmental treatment, PLS: Posterior-leaf-spring, Prn: Pro re nata (as needed), SAFO: Silicone ankle-foot orthosis.

| Center   | Follow-up                                                                                              |                           |                                                                                                                                  |
|----------|--------------------------------------------------------------------------------------------------------|---------------------------|----------------------------------------------------------------------------------------------------------------------------------|
|          | Frequency of check-up                                                                                  | Post-operative Assessment | If so, outcome measures used                                                                                                     |
| <b>A</b> | At 6 months and 12 months, then yearly                                                                 | Yes                       | Clinical only – function assessment                                                                                              |
| <b>B</b> | At 6 months, and 12 months, then yearly                                                                | Yes                       | 3DGA, MAS, FMS, Gillette FAQ, GMFM-66                                                                                            |
| <b>C</b> | At 3 months, and 6 months, then yearly                                                                 | Yes                       | Clinical exam, radiographs as indicated                                                                                          |
| <b>D</b> | At 6 months, 12 months, and 2 years                                                                    | Yes                       | MAS, GMFM 66, CP QOL, TUG, 3DGA when appropriate                                                                                 |
| <b>E</b> | First year: at 3-6-9-12 months, then yearly                                                            | Yes                       | 3DGA, FMS, GMFM-66, SPAT, functional strength, COPM, CPCHILD, Caregiver Questionnaire, X-rays hip and spine                      |
| <b>F</b> | At 1 month, then every 3 months for a year, then every 6 months for the next 4 years, then yearly      | Yes                       | GMFM-88, MAS, Wee-FIM, Video                                                                                                     |
| <b>G</b> | Every 3 months                                                                                         | Yes                       | MAS, GMFM-66, GMFCS, 3DGA                                                                                                        |
| <b>H</b> | Research: Baseline; at 12 months, 2-5-10 years<br>Clinical: + at 3 months, and 6 months, then annually | Yes                       | Imaging, 3DGA, MAS, MMST, (HAT), FCSs, FMS, Gillette FAQ, 6MWT, TUG, GMFM-66, COPM, CP-QoL, FACES pain, Promis pain interference |

*Abbreviations: 3DGA: 3D gait analysis, 6MWT: 6-minute walk test, COPM: Canadian Occupational Performance Measure, CPCHILD: Caregiver Priorities and Child Health Index of Life with Disability, CP-QOL: Cerebral Palsy Quality of Life, FCSs: Family Community Support service, FMS: Functional Mobility Scale, Gillette FAQ: Gillette Functional Assessment Questionnaire, GMFCS: Gross Motor Function Classification System, GMFM: Gross Motor Function Measure, HAT: Health Assessment Tool, MAS: Modified Ashworth Scale, MMST: Manual Muscle Strength Test, SPAT: Spasticity Test, TUG: Timed Up and Go Test, Wee-FIM: Functional Independence Measure for children.*
